# Supplementary material
Source: publisher figshare collection journal article supplement (https://sage.figshare.com/ndownloader/files/24172105)
Supplement: Supplementary file 1 [file 24172105]

## Supplementary Tables

Table 1S. Sociodemographic characteristics of survey respondents stratified by race/ethnicity: HINTS 2018

| Study sample                        | Race/ethnicity |             |            |            |            | p-value |
|-------------------------------------|----------------|-------------|------------|------------|------------|---------|
|                                     | Total          | NHW         | NHB        | Hispanic   | Other      |         |
| Unweighted population               | 3194           | 1861        | 408        | 425        | 500        |         |
| Weighted population                 | 229591005      | 139548102   | 23035220   | 33905701   | 33101982   |         |
| <b>Characteristics</b>              |                |             |            |            |            |         |
| <b>Knowledge of palliative care</b> |                |             |            |            |            | < 0.001 |
| No knowledge                        | 2097 (71)      | 1098 (65.5) | 310 (75)   | 334 (84.5) | 355 (77.9) |         |
| Inadequate knowledge                | 668 (18.1)     | 481 (22.6)  | 60 (14.3)  | 53 (9.2)   | 74 (10.9)  |         |
| Adequate knowledge                  | 429 (10.9)     | 282 (11.9)  | 38 (10.7)  | 38 (6.3)   | 71 (11.2)  |         |
| <b>Age group</b>                    |                |             |            |            |            | < 0.001 |
| 18-49                               | 1013 (51.2)    | 540 (48.3)  | 131 (50.2) | 190 (65.6) | 152 (49.5) |         |
| 50-64                               | 1046 (29.8)    | 607 (29.7)  | 157 (37.9) | 134 (25.1) | 148 (29.2) |         |
| 65+                                 | 1135 (19)      | 714 (22)    | 120 (11.8) | 101 (9.3)  | 200 (21.3) |         |
| <b>Gender</b>                       |                |             |            |            |            | 0.407   |
| Male                                | 1298 (48.7)    | 797 (49.4)  | 138 (43.7) | 170 (50.2) | 193 (47.7) |         |
| Female                              | 1896 (51.3)    | 1064 (50.6) | 270 (56.3) | 255 (49.8) | 307 (52.3) |         |
| <b>Region</b>                       |                |             |            |            |            | < 0.001 |
| Northeast                           | 480 (17.9)     | 290 (17.3)  | 48 (12.7)  | 58 (15.2)  | 84 (27)    |         |
| Midwest                             | 577 (21.2)     | 401 (25.8)  | 77 (18)    | 26 (11.6)  | 73 (13.9)  |         |
| South                               | 1372 (37.3)    | 750 (35.6)  | 247 (61.7) | 166 (28.6) | 209 (36.3) |         |
| West                                | 765 (23.6)     | 420 (21.4)  | 36 (7.6)   | 175 (44.7) | 134 (22.8) |         |
| <b>Education</b>                    |                |             |            |            |            | < 0.001 |
| Less than high school               | 806 (30.1)     | 370 (24.4)  | 123 (37.4) | 168 (46.1) | 145 (32.6) |         |
| High school graduate                | 208 (8.5)      | 121 (8.7)   | 27 (5.9)   | 29 (9.8)   | 31 (8.6)   |         |
| College or more                     | 2180 (61.4)    | 1370 (67)   | 258 (56.7) | 228 (44.2) | 324 (58.8) |         |
| <b>Marital status</b>               |                |             |            |            |            | < 0.001 |
| Single                              | 1625 (52.6)    | 1041 (57.1) | 130 (32.6) | 222 (53)   | 232 (47.2) |         |
| Divorced/widowed/separated          | 991 (16.2)     | 567 (16.6)  | 146 (19.7) | 107 (11.4) | 171 (16.9) |         |
| Married                             | 578 (31.2)     | 253 (26.3)  | 132 (47.7) | 96 (35.7)  | 97 (35.9)  |         |
| <b>Family income</b>                |                |             |            |            |            | < 0.001 |
| Less than \$20,000                  | 518 (15.8)     | 217 (12.2)  | 118 (31.1) | 93 (16.6)  | 90 (19.4)  |         |
| \$20,000 to < \$35,000              | 391 (10.7)     | 227 (10.9)  | 59 (12.8)  | 50 (11)    | 55 (8.2)   |         |
| \$35,000 to < \$50,000              | 379 (12.2)     | 201 (10.6)  | 61 (12.9)  | 61 (17.3)  | 56 (13.3)  |         |
| \$50,000 to < \$75,000              | 542 (16.8)     | 347 (18.2)  | 53 (8.8)   | 67 (16.8)  | 75 (16.7)  |         |
| \$75,000 or more                    | 1054 (36.3)    | 729 (42)    | 80 (26.3)  | 118 (31.2) | 127 (24.5) |         |
| Unknown                             | 310 (8.2)      | 140 (6.1)   | 37 (8.1)   | 36 (7.3)   | 97 (17.9)  |         |
| <b>Employment</b>                   |                |             |            |            |            | 0.184   |
| Employed                            | 1605 (57.7)    | 931 (57)    | 199 (62.2) | 246 (63.5) | 229 (51.9) |         |
| Not employed                        | 1589 (42.3)    | 930 (43)    | 209 (37.8) | 179 (36.5) | 271 (48.1) |         |
| <b>Health insurance</b>             |                |             |            |            |            | 0.001   |
| Yes                                 | 3027 (91.4)    | 1791 (94.2) | 384 (87.9) | 383 (85.4) | 469 (88.2) |         |
| No                                  | 167 (8.6)      | 70 (5.8)    | 24 (12.1)  | 42 (14.6)  | 31 (11.8)  |         |
| <b>General health</b>               |                |             |            |            |            | 0.027   |
| Excellent                           | 386 (15.1)     | 262 (17.1)  | 25 (11.6)  | 45 (10.8)  | 54 (13.1)  |         |

|                                 |             |             |            |            |            |         |
|---------------------------------|-------------|-------------|------------|------------|------------|---------|
| Very good                       | 1184 (35.3) | 754 (37.5)  | 130 (31)   | 138 (32.2) | 162 (32)   |         |
| Good                            | 1115 (34.8) | 593 (33.3)  | 171 (38.1) | 164 (36.8) | 187 (36.7) |         |
| Fair                            | 419 (12.1)  | 203 (9.7)   | 73 (16.9)  | 65 (16.6)  | 78 (14.3)  |         |
| Poor                            | 90 (2.7)    | 49 (2.3)    | 9 (2.4)    | 13 (3.6)   | 19 (3.8)   |         |
| <b>Diagnosed with cancer</b>    |             |             |            |            |            | < 0.001 |
| Yes                             | 539 (9.2)   | 378 (11.5)  | 47 (4.4)   | 38 (5.6)   | 76 (6.9)   |         |
| No                              | 2655 (90.8) | 1483 (88.5) | 361 (95.6) | 387 (94.4) | 424 (93.1) |         |
| <b>Family history of cancer</b> |             |             |            |            |            | < 0.001 |
| Yes                             | 2303 (70.8) | 1464 (77.7) | 268 (65.1) | 253 (56.2) | 318 (60.7) |         |
| No                              | 643 (21.3)  | 302 (17.9)  | 88 (23.8)  | 126 (29.8) | 127 (24.9) |         |
| Not sure                        | 248 (7.9)   | 95 (4.4)    | 52 (11.1)  | 46 (14)    | 55 (14.3)  |         |

Table 2S. Predictors of knowledge of Palliative Care Using Logistic Regression, Reduced Model

| Characteristics            | Northeast         |              | Midwest           |              | South              |                 | West              |              |
|----------------------------|-------------------|--------------|-------------------|--------------|--------------------|-----------------|-------------------|--------------|
|                            | OR (95% CI)       | p-value      | OR (95% CI)       | p-value      | OR (95% CI)        | p-value         | OR (95% CI)       | p-value      |
| <b>Age group</b>           |                   |              |                   |              |                    |                 |                   |              |
| 18-49                      | 1                 |              | 1                 |              |                    |                 |                   |              |
| 50-64                      | 1.41 (0.72-2.76)  | 0.306        | 3.2 (1.37-7.45)   | <b>0.008</b> | 0.93 (0.49-1.76)   | 0.812           | 1.79 (1.08-2.96)  | 0.024        |
| 65+                        | 1.4 (0.74-2.65)   | 0.298        | 2.06 (0.91-4.66)  | <b>0.081</b> | 0.99 (0.57-1.72)   | 0.973           | 2.1 (1.24-3.54)   | <b>0.006</b> |
| <b>Gender</b>              |                   |              |                   |              |                    |                 |                   |              |
| Male                       | 1                 |              | 1                 |              |                    |                 |                   |              |
| Female                     | 1.63 (0.79-3.36)  | 0.180        | 3.05 (1.5-6.21)   | <b>0.003</b> | 2.32 (1.59-3.39)   | <b>&lt;.001</b> | 1.59 (0.86-2.96)  | 0.139        |
| <b>Race/ethnicity</b>      |                   |              |                   |              |                    |                 |                   |              |
| Non-Hispanic white         | 1                 |              | 1                 |              |                    |                 |                   |              |
| Non-Hispanic black         | 0.83 (0.26-2.66)  | 0.751        | 0.85 (0.27-2.65)  | 0.768        | 0.59 (0.31-1.14)   | 0.116           | 1.47 (0.15-14.17) | 0.736        |
| Hispanic                   | 0.26 (0.1-0.68)   | <b>0.007</b> | 0.21 (0.02-2)     | 0.169        | 0.31 (0.15-0.62)   | <b>0.001</b>    | 0.88 (0.33-2.39)  | 0.799        |
| Other                      | 0.68 (0.33-1.41)  | 0.297        | 1.27 (0.45-3.6)   | 0.650        | 0.4 (0.22-0.7)     | <b>0.002</b>    | 0.48 (0.22-1.03)  | 0.059        |
| <b>Education</b>           |                   |              |                   |              |                    |                 |                   |              |
| Less than high school      | 1                 |              | 1                 |              |                    |                 |                   |              |
| High school graduate       | 1.08 (0.09-13.24) | 0.950        | 0.83 (0.05-14.38) | 0.897        | 5.13 (0.83-31.55)  | 0.077           | 0.45 (0.01-17.58) | 0.666        |
| Some college               | 5.69 (0.35-91.91) | 0.215        | 1.51 (0.07-31.34) | 0.788        | 21.04 (3.02-146.7) | <b>0.003</b>    | 4.39 (0.09-211.1) | 0.447        |
| College or higher          | 4.58 (0.39-53.62) | 0.220        | 3.16 (0.19-54.13) | 0.419        | 14.68 (2.54-85.0)  | <b>0.003</b>    | 3.34 (0.09-122.5) | 0.505        |
| <b>Marital status</b>      |                   |              |                   |              |                    |                 |                   |              |
| Single                     | 1                 |              | 1                 |              |                    |                 |                   |              |
| Divorced/widowed/separated | 0.75 (0.39-1.45)  | 0.389        | 0.56 (0.29-1.08)  | 0.081        | 0.94 (0.66-1.35)   | 0.746           | 1.34 (0.55-3.22)  | 0.513        |
| Married                    | 0.97 (0.39-2.45)  | 0.952        | 0.38 (0.12-1.22)  | 0.102        | 0.48 (0.27-0.84)   | <b>0.011</b>    | 0.84 (0.47-1.5)   | 0.545        |

Table 3S. Survey respondents' knowledge of Goal of Palliative Care by race/ethnicity.

| <b>Race</b>                                                             | <b>Total<br/>n</b> | <b>NHW<br/>n (Col. %)</b> | <b>NHB<br/>n (Col. %)</b> | <b>Hispanic<br/>n (Col. %)</b> | <b>Other<br/>n (Col. %)</b> | <b>P-Value</b> |
|-------------------------------------------------------------------------|--------------------|---------------------------|---------------------------|--------------------------------|-----------------------------|----------------|
| <b>Help friends and family<br/>to cope with a patient's<br/>illness</b> |                    |                           |                           |                                |                             | 0.848          |
| Agree/somewhat agree                                                    | 949                | 658 (87.1%)               | 89 (88.4%)                | 80 (86%)                       | 122 (84.2%)                 |                |
| Disagree/don't know                                                     | 111                | 83 (9.3%)                 | 6 (5.4%)                  | 10 (10.4%)                     | 12 (6.8%)                   |                |
| <b>Offer social and<br/>emotional support</b>                           |                    |                           |                           |                                |                             | 0.297          |
| Agree/somewhat agree                                                    | 974                | 684 (90.9%)               | 88 (90.4%)                | 83 (92.3%)                     | 119 (79%)                   |                |
| Disagree/don't know                                                     | 82                 | 55 (5.1%)                 | 5 (6.2%)                  | 7 (4.1%)                       | 15 (11.7%)                  |                |
| <b>Manage pain and other<br/>physical symptoms</b>                      |                    |                           |                           |                                |                             | 0.656          |
| Agree/somewhat agree                                                    | 1004               | 703 (93.3%)               | 91 (91.3%)                | 84 (92.4%)                     | 126 (85%)                   |                |
| Disagree/don't know                                                     | 65                 | 46 (4.5%)                 | 4 (5.8%)                  | 6 (4%)                         | 9 (5.7%)                    |                |
| <b>Give patients more time<br/>at the end of life</b>                   |                    |                           |                           |                                |                             | 0.692          |
| Agree/somewhat agree                                                    | 605                | 403 (53.8%)               | 54 (50.7%)                | 58 (61.4%)                     | 90 (62.7%)                  |                |
| Disagree/don't know                                                     | 446                | 332 (41.3%)               | 38 (40.2%)                | 31 (34.7%)                     | 45 (30.5%)                  |                |

Table 4S. Survey respondents' Misconceptions of Palliative Care by geographic race/ethnicity

| Race/ethnicity                                                                                           | Total<br>n | NHW<br>n (Col.%) | NHB<br>n (Col.%) | Hispanic<br>n (Col.%) | Other<br>n (Col.%) | P-Value |
|----------------------------------------------------------------------------------------------------------|------------|------------------|------------------|-----------------------|--------------------|---------|
| <b>Accepting palliative care means giving up</b>                                                         |            |                  |                  |                       |                    | 0.061   |
| Agree/somewhat agree                                                                                     | 157        | 113 (13.3%)      | 7 (5.1%)         | 13 (16.2%)            | 24 (24.3%)         |         |
| Disagree/don't know                                                                                      | 910        | 635 (84.8%)      | 87 (85%)         | 75 (79.7%)            | 113 (71.4%)        |         |
| <b>It's a doctor's obligation to inform all patients with cancer about the option of palliative care</b> |            |                  |                  |                       |                    | 0.381   |
| Agree/somewhat agree                                                                                     | 901        | 637 (84.6%)      | 76 (67.9%)       | 75 (68.6%)            | 113 (78.8%)        |         |
| Disagree/don't know                                                                                      | 175        | 117 (13.8%)      | 17 (23.6%)       | 15 (27.8%)            | 26 (17.1%)         |         |
| <b>If you accept palliative care, you must stop other treatments</b>                                     |            |                  |                  |                       |                    | 0.226   |
| Agree/somewhat agree                                                                                     | 148        | 94 (11.8%)       | 9 (9.3%)         | 16 (18.5%)            | 29 (21.9%)         |         |
| Disagree/don't know                                                                                      | 926        | 659 (86.4%)      | 85 (82.3%)       | 74 (77.9%)            | 108 (72.8%)        |         |
| <b>Palliative care is the same as hospice care</b>                                                       |            |                  |                  |                       |                    | 0.321   |
| Agree/somewhat agree                                                                                     | 346        | 226 (28.3%)      | 34 (37.2%)       | 32 (37.5%)            | 54 (38.2%)         |         |
| Disagree/don't know                                                                                      | 725        | 523 (70.1%)      | 62 (60.3%)       | 57 (58.4%)            | 83 (58.8%)         |         |
| <b>When I think palliative care, I automatically think of death</b>                                      |            |                  |                  |                       |                    | 0.468   |
| Agree/somewhat agree                                                                                     | 436        | 321 (43.5%)      | 28 (30.7%)       | 30 (32.4%)            | 57 (42.7%)         |         |
| Disagree/don't know                                                                                      | 640        | 431 (55.1%)      | 67 (66.4%)       | 60 (64%)              | 82 (52.3%)         |         |

Table 5S. Survey Respondents' Information Source of Seeking Knowledge of Palliative Care by Race/ethnicity.

| Information Source                  | Total<br>n | NHW<br>n (Col. %) | NHB<br>n (Col. %) | Hispanic<br>n (Col. %) | Other<br>n (Col. %) | P-Value |
|-------------------------------------|------------|-------------------|-------------------|------------------------|---------------------|---------|
| <b>The first source</b>             |            |                   |                   |                        |                     | 0.008   |
| Printed materials                   | 13         | 9 (0.8%)          | 2 (1.7%)          | 1 (0.6%)               | 1 (1.3%)            |         |
| Health care provider                | 635        | 431 (53%)         | 58 (54.7%)        | 44 (48.1%)             | 102 (70.7%)         |         |
| Conversations with people you trust | 76         | 63 (7.8%)         | 2 (1.7%)          | 7 (4.8%)               | 4 (2.4%)            |         |
| Online (Internet and social media)  | 295        | 216 (32%)         | 26 (28.3%)        | 28 (36.7%)             | 25 (17.8%)          |         |
| Unknown                             | 78         | 44 (6.3%)         | 10 (13.6%)        | 11 (9.8%)              | 13 (7.9%)           |         |
| <b>The most trusted source</b>      |            |                   |                   |                        |                     | 0.388   |
| Printed materials                   | 13         | 8 (1.1%)          | 1 (0.3%)          | 3 (2.8%)               | 1 (0.2%)            |         |
| Health care provider                | 876        | 614 (79.5%)       | 78 (77.6%)        | 63 (77.4%)             | 121 (82.1%)         |         |
| Conversations with people you trust | 75         | 58 (6.4%)         | 3 (5.9%)          | 8 (7.7%)               | 6 (6.4%)            |         |
| Online (Internet and social media)  | 81         | 56 (9.4%)         | 11 (8.2%)         | 6 (3%)                 | 8 (6.7%)            |         |
| Unknown                             | 52         | 27 (3.6%)         | 5 (8%)            | 11 (9.1%)              | 9 (4.7%)            |         |
